# Supplementary material for: Gene expression changes in human lung cells exposed to arsenic, chromium, nickel or vanadium indicate the first steps in cancer
Source: Royal Society of Chemistry journal article supplement (doi:10.1039/c2mt20074k), 2012-01-01
Supplement: c2mt20074k_2.pdf [file c2mt20074k_2.pdf]

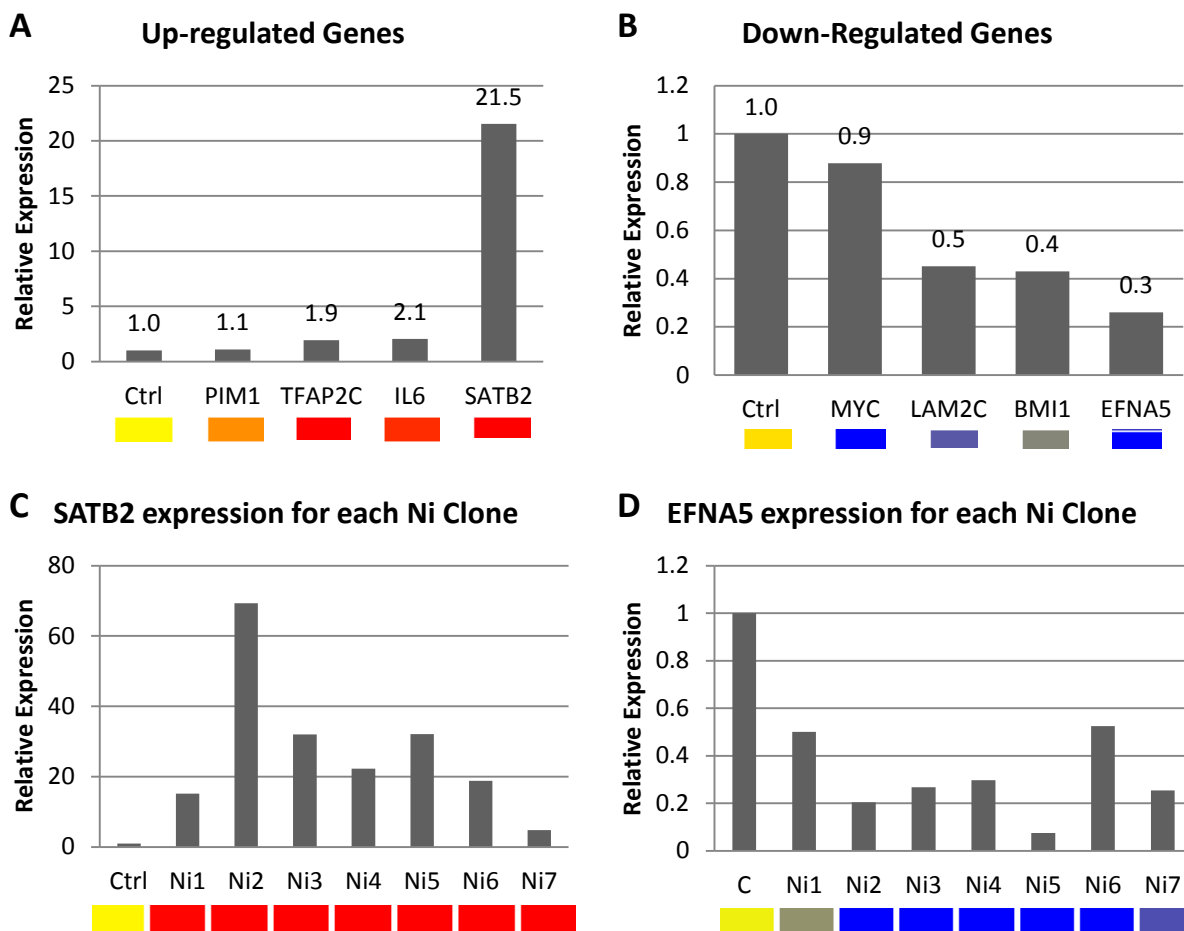

Supplementary Figure 1 Real-Time PCR Validation of Affymetrix Gene Expression Array Results . Figure 1A shows both Affymetrix fold change and qPCR fold change results for four up-regulated genes. Figure 1B shows the same for four down-regulated genes. Quantitative PCR was performed with one randomly selected nickel-transformed clone. Results for chromium clones were also analyzed by qPCR<sup>1</sup>. Figure 1C/D: qPCR fold-change for each Ni-transformed clone for one up-regulated gene (SATB2) and one down-regulated gene (EFNA5).

<sup>1</sup> H. Sun, H. A. Clancy, T. Kluz, J. Zavadil, M. Costa, Comparison of Gene Expression Profiles in Chromate Transformed BEAS-2B Cells. *PLoS One* 2011, 6.
